# Supplementary material for: Cycles of Andean mountain building archived in the Amazon Fan
Source: Nat Commun. 2022 Nov 15;13:6983. doi: 10.1038/s41467-022-34561-6 (PMC9666610; doi:10.1038/s41467-022-34561-6)
Supplement: Supplementary file 4 — Supplementary Data 1 [file 41467_2022_34561_MOESM4_ESM.xlsx]

## Sheet: data
Reduced (U-Th[Sm])/He Data
Sample	mineral	Age, Ma	err., Ma	U (ppm)	Th (ppm)	147Sm (ppm)	[U]e	Th/U	He (nmol/g)	mass (μg)	Ft	ESR	Owner
zAmazon945-1-2	zircon	284.388	22.7511	220.022	93.331	6.21042	241.538	0.424189	311.571	12.11	0.822043	67.02	Cody Mason
zAmazon945-1-3	zircon	1515.21	121.217	28.428	24.0368	3.69914	33.9798	0.845534	241.215	5.08	0.756088	48.65	Cody Mason
zAmazon945-1-4	zircon	280.798	22.4639	106.459	35.5029	1.47053	114.64	0.333488	151.145	19.17	0.850749	80.15	Cody Mason
zAmazon945-1-13	zircon	14.0645	1.12516	76.5631	106.383	9.9395	101.102	1.38948	6.21631	9.46	0.804789	62.82	Cody Mason
zAmazon945-1-15	zircon	184.903	14.7922	101.426	51.3179	14.9081	113.314	0.505965	91.5089	7.57	0.797609	58.74	Cody Mason
zAmazon945-1-23	zircon	181.124	14.4899	172.599	61.2409	2.40279	186.709	0.354816	137.785	3.91	0.745667	45.45	Cody Mason
zAmazon945-1-24	zircon	13.7799	1.1024	249.394	70.2504	1.45884	265.573	0.281684	15.4474	6.44	0.781725	53.37	Cody Mason
zAmazon945-1-26	zircon	410.388	32.8311	79.4085	32.9062	1.06518	86.9889	0.414392	158.849	8.82	0.798847	58.85	Cody Mason
zAmazon945-1-28	zircon	523.379	41.8703	57.3528	36.9293	3.28525	65.8704	0.643898	148.083	5.72	0.765208	50.46	Cody Mason
zAmazon945-1-32	zircon	407.698	32.6159	229.176	150.768	2.63163	263.896	0.657869	436.578	3.57	0.730492	43.35	Cody Mason
zAmazon945-1-35	zircon	21.512	1.72096	128.701	37.8728	0.514508	137.421	0.294271	13.5485	18.26	0.848135	78.53	Cody Mason
zAmazon945-1-41	zircon	86.9531	6.95625	54.083	64.8414	3.57255	69.0273	1.19893	24.9746	5.26	0.763369	50.89	Cody Mason
zAmazon945-1-42	zircon	6.48952	0.519162	36.9768	15.9419	0	40.6466	0.431131	1.00687	2.34	0.706661	39.04	Cody Mason
zAmazon945-1-45	zircon	10.6314	0.850512	51.9186	36.4797	1.13056	60.3219	0.702632	2.78475	8.31	0.802334	60.65	Cody Mason
zAmazon945-1-46	zircon	491.483	39.3187	93.543	33.8998	3.54959	101.365	0.362398	228.712	10.59	0.81768	65.08	Cody Mason
zAmazon945-1-49	zircon	32.1807	2.57446	304.586	227.725	0	357.008	0.747655	44.806	2.9	0.719594	41.65	Cody Mason
zAmazon945-1-60	zircon	217.186	17.3749	327.879	79.3304	8.36576	346.182	0.241951	334.398	8.99	0.811104	62.27	Cody Mason
zAmazon945-1-69	zircon	11.3021	0.904165	115.847	11.8591	2.64671	118.59	0.102369	5.70905	7.1	0.789864	54.87	Cody Mason
zAmazon945-1-71	zircon	9.4017	0.752136	109.235	49.9333	0.572512	120.732	0.457119	5.11187	16.41	0.833353	72.2	Cody Mason
zAmazon945-1-74	zircon	1219.03	97.5227	44.1672	29.1349	1.22489	50.8802	0.659649	297.749	7.67	0.795653	58.54	Cody Mason
zAmazon945-1-75	zircon	548.567	43.8854	22.497	20.5402	1.72384	27.234	0.913021	64.9357	5.45	0.772546	52.66	Cody Mason
zAmazon945-1-76	zircon	173.312	13.865	158.975	43.2437	2.70747	168.943	0.272016	116.136	3.47	0.726798	41.8	Cody Mason
zAmazon945-1-77	zircon	69.9262	5.5941	215.499	54.6578	3.91455	228.1	0.253634	60.7956	2.4	0.703526	38.15	Cody Mason
zAmazon945-1-78	zircon	65.8552	5.26842	167.403	90.1191	3.31976	188.165	0.538338	48.3723	2.83	0.719502	41.22	Cody Mason
zAmazon945-1-97	zircon	247.18	19.7744	86.213	44.406	0.942319	96.4399	0.515073	104.819	9.97	0.799521	59.27	Cody Mason
zAmazon945-1-99	zircon	14.6981	1.17584	337.094	186.209	4.46693	379.981	0.552394	24.557	10.52	0.812883	63.89	Cody Mason
zAmazon945-1-100	zircon	30.9766	2.47813	60.6277	29.9731	2.15293	67.5383	0.49438	9.34139	17.46	0.824714	68.3	Cody Mason
zAmazon945-1-102	zircon	361.861	28.9488	42.6792	13.8533	3.02603	45.8834	0.324591	72.0957	6.21	0.783119	53.95	Cody Mason
zAmazon945-1-104	zircon	1038.75	83.0996	88.6069	85.4802	4.91881	108.309	0.964712	444.451	1.91	0.680796	36.32	Cody Mason
zAmazon945-1-106	zircon	60.4939	4.83952	269.572	95.8102	1.78611	291.636	0.355417	74.1443	5.26	0.775445	52.04	Cody Mason
zAmazon945-1-107	zircon	2.81979	0.225583	234.601	101.004	0.735702	257.856	0.430537	3.24068	12.77	0.825282	68.49	Cody Mason
zAmazon945-1-110	zircon	439.125	35.13	265.115	91.9328	9.58756	286.326	0.346766	485.231	1.96	0.694503	37.07	Cody Mason
zAmazon945-1-113	zircon	4.68073	0.374458	93.6015	66.218	2.26384	108.856	0.707447	2.06964	4.15	0.750813	47.32	Cody Mason
zAmazon945-1-115	zircon	117.95	9.43596	370.229	126.836	13.7067	399.495	0.342588	200.247	6.86	0.780876	53.34	Cody Mason
zAmazon945-1-118	zircon	15.2591	1.22072	246.755	217.125	4.27042	296.759	0.87992	16.9777	2.2	0.692022	37.72	Cody Mason
zAmazon945-1-121	zircon	455.63	36.4504	123.236	33.4827	2.92704	130.959	0.271696	261.74	6.42	0.785086	54.31	Cody Mason
zAmazon945-1-128	zircon	293.196	23.4557	109.02	58.5704	3.95613	122.523	0.537243	150.99	4.75	0.762263	49.4	Cody Mason
zAmazon945-1-130	zircon	299.008	23.9206	150.768	73.9158	0.993121	167.788	0.490263	224.558	9.46	0.81042	63	Cody Mason
zAmazon945-1-132	zircon	422.479	33.7983	69.6957	47.0334	3.43829	80.54	0.674839	152.131	8.28	0.801539	60.36	Cody Mason
zAmazon945-1-133	zircon	340.251	27.22	80.6713	49.9338	2.15145	92.1769	0.618979	131.376	4.41	0.75706	48.44	Cody Mason
zAmazon945-1-134	zircon	6.40156	0.512125	362.814	103.069	1.49181	386.547	0.284082	10.4957	6.36	0.785912	54.49	Cody Mason
zAmazon945-1-136	zircon	59.5002	4.76002	402.562	225.095	0	454.379	0.559154	109.248	4.66	0.744958	45.84	Cody Mason
zAmazon945-1-137	zircon	891.325	71.306	67.7072	27.279	4.63665	74.01	0.402897	294.555	6.14	0.76882	50.55	Cody Mason
zAmazon945-1-138	zircon	32.2822	2.58258	46.4797	31.1289	6.12105	53.6762	0.669731	6.7047	3.07	0.713967	40.58	Cody Mason
zAmazon945-1-139	zircon	47.8619	3.82896	194.557	109.235	2.18615	219.714	0.561453	42.9032	4.34	0.752651	47.38	Cody Mason
zAmazon945-1-140	zircon	136.087	10.8869	164.422	51.6474	2.32548	176.323	0.314115	96.1731	4.04	0.736068	43.47	Cody Mason
zAmazon946-4-3	zircon	25.5645	2.04516	66.3751	23.9219	6.60879	71.9149	0.360406	6.4928	1.45	0.653198	32.19	Cody Mason
zAmazon946-4-15	zircon	100.135	8.01082	147.972	42.6797	0	157.796	0.288432	55.2591	1.58	0.644493	31.09	Cody Mason
zAmazon946-4-38	zircon	493.127	39.4502	40.6126	104.561	9.68046	64.731	2.57461	120.395	1.98	0.675512	36.62	Cody Mason
zAmazon946-4-46	zircon	382.065	30.5652	63.1722	82.9317	9.12128	82.3087	1.31279	107.116	1.03	0.615863	29.63	Cody Mason
zAmazon946-4-53	zircon	15.2517	1.22014	544.515	84.0889	4.81791	563.896	0.154429	31.5665	1.95	0.680318	34.74	Cody Mason
zAmazon946-4-57	zircon	219.788	17.5831	177.559	82.6806	24.475	196.714	0.465652	161.518	1.92	0.682198	35.7	Cody Mason
zAmazon946-4-58	zircon	20.1614	1.61291	271.375	92.7381	0	292.723	0.341734	21.2628	1.61	0.666831	33.63	Cody Mason
zAmazon946-4-68	zircon	37.3322	2.98657	502.069	227.249	80.6325	554.785	0.452626	73.4249	1.75	0.654783	32.52	Cody Mason
zAmazon946-4-77	zircon	41.8424	3.34739	301.113	69.9473	0	317.215	0.232296	53.7435	4.47	0.748722	45.62	Cody Mason
zAmazon946-4-88	zircon	119.839	9.58711	82.8491	57.0477	0	95.9815	0.688574	44.3172	2.93	0.707359	39.6	Cody Mason
zAmazon946-4-119	zircon	190.552	15.2442	42.0852	26.466	2.4594	48.1899	0.628867	37.103	3.82	0.73819	44.74	Cody Mason
zAmazon946-4-121	zircon	48.2081	3.85665	231.749	116.426	9.52142	258.598	0.50238	48.9296	2.99	0.724303	41.96	Cody Mason
zAmazon946-4-135	zircon	289.5	23.16	115.376	44.7018	6.94402	125.701	0.387445	131.146	1.38	0.655947	32.52	Cody Mason
zAmazon946-4-a-126	zircon	464.208	37.1367	34.2836	19.4561	2.72667	38.776	0.567505	79.305	6.96	0.787673	55.85	Cody Mason
zAmazon946-5-12	zircon	200.828	16.0663	86.8525	82.4809	3.10035	105.855	0.949666	94.0903	9.33	0.806258	62.56	Cody Mason
zAmazon946-5-24	zircon	576.148	46.0919	68.5932	32.227	0	76.0119	0.469828	212.63	23.62	0.856205	84.25	Cody Mason
zAmazon946-5-26	zircon	22.3217	1.78573	228.134	255.575	3.86048	286.987	1.12028	30.028	29.98	0.863603	91.02	Cody Mason
zAmazon946-5-47	zircon	460.071	36.8057	3.64049	3.42555	0	4.42905	0.940957	8.80525	5.69	0.773365	52.77	Cody Mason	zircon?
zAmazon946-5-55	zircon	594.095	47.5276	140.451	87.3369	3.23771	160.573	0.62183	454.841	17.87	0.840482	75.88	Cody Mason
zAmazon946-5-56	zircon	10.0039	0.80031	179.957	58.8965	0	193.515	0.327281	8.73482	15.16	0.835562	72.46	Cody Mason
zAmazon946-5-59	zircon	194.372	15.5498	109.042	44.6998	0	119.332	0.409931	103.729	10.5	0.816476	64.89	Cody Mason
zAmazon946-5-70	zircon	585.841	46.8673	101.607	32.5429	0	109.099	0.32028	296.147	10.73	0.818148	65.09	Cody Mason
zAmazon946-5-72	zircon	321.257	25.7005	187.489	71.0154	0	203.837	0.378771	300.002	12.67	0.82778	69.27	Cody Mason
zAmazon946-5-83	zircon	585.484	46.8387	75.0076	62.2715	2.1285	89.3532	0.830202	245.678	13.59	0.829381	71.34	Cody Mason
zAmazon946-5-86	zircon	52.7979	4.22383	107.913	44.908	0	118.25	0.416152	27.4008	10	0.809829	62.4	Cody Mason
zAmazon946-5-89	zircon	199.133	15.9306	50.1805	30.7022	0	57.2482	0.611835	55.0133	38.65	0.879065	101.28	Cody Mason
zAmazon946-5-90	zircon	72.0491	5.76393	75.366	13.3125	0	78.4306	0.176638	26.7446	32.62	0.872898	93.8	Cody Mason
zAmazon946-5-121	zircon	195.831	15.6665	41.4146	11.4846	0	44.0584	0.277308	40.8493	25.9	0.863961	88.3	Cody Mason
zAmazon946-5-122	zircon	576.835	46.1468	57.361	26.0804	-1.8719	63.3553	0.454671	172.014	15.45	0.831374	71.02	Cody Mason
zAmazon946-5-126	zircon	6.87116	0.549693	91.9074	35.3464	0	100.044	0.384587	3.14555	19.01	0.847278	78.56	Cody Mason
zAmazon946-5-127	zircon	19.1302	1.53041	51.7311	29.4932	0	58.5204	0.570126	5.20736	26.24	0.859553	86.95	Cody Mason
zAmazon946-5-132	zircon	264.331	21.1465	91.2289	39.0814	2.15065	100.236	0.428389	120.919	13.45	0.828302	69.52	Cody Mason
zAmazon946-5-138	zircon	538.3	43.064	282.587	157.339	6.87086	318.84	0.556781	720.468	4.21	0.747701	46.41	Cody Mason
zAmazon946-5-140	zircon	10.4181	0.833446	32.1166	17.5622	0	36.1594	0.546825	1.78454	37.18	0.876051	98.57	Cody Mason
zAmazon946-8-5	zircon	289.291	23.1433	100.442	25.5033	0	106.313	0.25391	139.468	10.87	0.82195	66.27	Cody Mason
zAmazon946-8-8	zircon	250.97	20.0776	43.2825	19.8213	1.2628	47.8517	0.457951	52.3823	7.44	0.79309	57.14	Cody Mason
zAmazon946-8-9	zircon	12.6564	1.01251	45.4875	10.1463	3.02771	47.8383	0.223057	2.65521	9.28	0.812352	62.6	Cody Mason
zAmazon946-8-13	zircon	197.741	15.8193	7.75037	3.79166	0.484485	8.62564	0.489223	7.9354	19.3922	0.848286	79.6395	Cody Mason	zircon? Lost?
zAmazon946-8-21	zircon	71.6203	5.72962	259.057	91.8093	10.0246	280.241	0.354398	87.7148	9.38	0.805505	60.62	Cody Mason
zAmazon946-8-28	zircon	10.2257	0.81806	117.822	29.9849	1.32409	124.731	0.254494	5.87101	21.22	0.852754	81.23	Cody Mason
zAmazon946-8-29	zircon	667.063	53.365	77.7223	33.0787	5.38667	85.3639	0.425601	277.702	20.87	0.852223	81.5	Cody Mason
zAmazon946-8-33	zircon	63.9553	5.11643	25.63	22.212	1.33835	30.7499	0.86664	8.39534	7.02	0.785322	55.86	Cody Mason
zAmazon946-8-35	zircon	23.2762	1.86209	132.719	31.1339	0.807845	139.89	0.234584	14.4306	11.63	0.82039	65.64	Cody Mason
zAmazon946-8-36	zircon	114.71	9.17679	79.8048	69.8834	3.34293	95.9086	0.875679	52.2445	33.76	0.869931	95.04	Cody Mason
zAmazon946-8-37	zircon	735.009	58.8008	16.0538	16.1548	1.00025	19.7776	1.00629	71.852	28.09	0.859476	87.94	Cody Mason
zAmazon946-8-42	zircon	416.763	33.341	65.7622	57.269	4.18735	78.9665	0.87085	144.025	6.71	0.785294	55.89	Cody Mason
zAmazon946-8-49	zircon	24.3064	1.94451	112.315	54.7949	0	124.929	0.487866	13.1563	7.92	0.800786	59.6	Cody Mason
zAmazon946-8-51	zircon	15.3773	1.23019	54.8524	53.815	0.968581	67.2455	0.981086	4.4825	9.7	0.7996	60.32	Cody Mason
zAmazon946-8-68	zircon	31.0404	2.48323	200.798	35.2242	1.93885	208.916	0.175421	29.23	14.54	0.834164	70.86	Cody Mason
zAmazon946-8-81	zircon	556.973	44.5578	162.937	38.2363	1.83057	171.748	0.234669	454.426	15.4	0.839769	74.13	Cody Mason
zAmazon946-8-82	zircon	398.166	31.8533	176.899	83.4882	14.2927	196.19	0.471954	354.396	13.17	0.814587	64.34	Cody Mason
zAmazon946-8-105	zircon	210.542	16.8433	76.4098	41.0315	2.43055	85.8674	0.536993	80.8464	11.56	0.815012	64.63	Cody Mason
zAmazon946-8-104	zircon	304.006	24.3205	56.3139	49.9977	0.948056	67.8281	0.88784	91.6171	9.91	0.803594	61.57	Cody Mason
zAmazon946-8-133	zircon	487.768	39.0214	139.852	303.57	11.7485	209.792	2.17066	482.379	21.54	0.839362	78	Cody Mason
zAmazon946-9-21	zircon	792.884	63.4307	63.8345	38.8276	3.91325	72.7922	0.608255	262.77	7.18	0.790679	56.85	Cody Mason
zAmazon946-9-34	zircon	431.43	34.5144	128.019	31.5413	0	135.28	0.246379	253.168	5.56	0.778256	52.31	Cody Mason
zAmazon946-9-40	zircon	107.363	8.58903	32.3722	22.6463	3.30944	37.6019	0.699561	17.6733	8.49	0.803356	61.09	Cody Mason
zAmazon946-9-49	zircon	218.081	17.4465	30.37	26.6118	1.69771	36.5045	0.876254	36.5971	16.55	0.836061	74.52	Cody Mason
zAmazon946-9-55	zircon	469.169	37.5335	121.707	47.1171	0	132.553	0.387135	256.91	4.49	0.740186	44.42	Cody Mason
zAmazon946-9-56	zircon	237.29	18.9832	100.191	45.1301	3.08759	110.596	0.450439	115.431	9.1	0.800478	59.5	Cody Mason
zAmazon946-9-66	zircon	9.30743	0.744594	25.5172	11.4555	0.817252	28.1584	0.448931	1.23036	34.38	0.868662	92.22	Cody Mason
zAmazon946-9-87	zircon	3.77876	0.302301	50.4126	37.1259	2.86413	58.9733	0.736441	0.968404	9.81	0.803094	60.98	Cody Mason
zAmazon946-9-89	zircon	25.452	2.03616	55.9161	53.7525	3.394	68.3069	0.961305	8.01913	24.84	0.850158	81.9	Cody Mason
zAmazon946-9-98	zircon	445.545	35.6436	18.3734	26.747	8.82579	24.5747	1.45574	51.3458	19.11	0.836923	76.18	Cody Mason
zAmazon946-9-108	zircon	2.9413	0.235304	95.447	36.5219	2.22112	103.865	0.382641	1.36537	12.65	0.827742	69.1	Cody Mason
zAmazon946-9-128	zircon	475.026	38.0021	64.1793	26.2634	1.95254	70.2349	0.409219	155.882	14.39	0.832773	71.53	Cody Mason
zAmazon946-9-134	zircon	483.124	38.6499	27.176	8.28626	0	29.0835	0.304911	65.6774	13.58	0.83256	70.94	Cody Mason
zAmazon946-9-135	zircon	258.266	20.6613	60.0134	14.8806	0	63.4389	0.247955	72.6954	10.05	0.806629	60.59	Cody Mason

## Sheet: plots
Sample	mineral	Age, Ma	err., Ma	U-Pb age (Ma)	U (ppm)	Th (ppm)	147Sm (ppm)	[U]e	Th/U	He (nmol/g)	mass (μg)	Ft	ESR	Owner
zAmazon945-1-71	zircon	9.4017	0.752136	12.3	109.235	49.9333	0.572512	120.732	0.457119	5.11187	16.41	0.833353	72.2	Cody Mason		0	0
zAmazon945-1-118	zircon	15.2591	1.22072	18.49	246.755	217.125	4.27042	296.759	0.87992	16.9777	2.2	0.692022	37.72	Cody Mason		50	50
zAmazon945-1-49	zircon	32.1807	2.57446	30.11	304.586	227.725	0	357.008	0.747655	44.806	2.9	0.719594	41.65	Cody Mason		100	100
zAmazon945-1-100	zircon	30.9766	2.47813	40.4	60.6277	29.9731	2.15293	67.5383	0.49438	9.34139	17.46	0.824714	68.3	Cody Mason		500	500
zAmazon945-1-136	zircon	59.5002	4.76002	62.6	402.562	225.095	0	454.379	0.559154	109.248	4.66	0.744958	45.84	Cody Mason		1000	1000
zAmazon946-4-77	zircon	41.8424	3.34739	91.5	301.113	69.9473	0	317.215	0.232296	53.7435	4.47	0.748722	45.62	Cody Mason		2000	2000
zAmazon946-4-15	zircon	100.135	8.01082	94.2	147.972	42.6797	0	157.796	0.288432	55.2591	1.58	0.644493	31.09	Cody Mason
zAmazon946-8-36	zircon	114.71	9.17679	120.7	79.8048	69.8834	3.34293	95.9086	0.875679	52.2445	33.76	0.869931	95.04	Cody Mason
zAmazon946-9-108	zircon	2.9413	0.235304	127.8	95.447	36.5219	2.22112	103.865	0.382641	1.36537	12.65	0.827742	69.1	Cody Mason
zAmazon945-1-107	zircon	2.81979	0.225583	134.5	234.601	101.004	0.735702	257.856	0.430537	3.24068	12.77	0.825282	68.49	Cody Mason
zAmazon945-1-99	zircon	14.6981	1.17584	149.4	337.094	186.209	4.46693	379.981	0.552394	24.557	10.52	0.812883	63.89	Cody Mason
zAmazon945-1-97	zircon	247.18	19.7744	157.5	86.213	44.406	0.942319	96.4399	0.515073	104.819	9.97	0.799521	59.27	Cody Mason	zircon?
zAmazon946-9-87	zircon	3.77876	0.302301	163.2	50.4126	37.1259	2.86413	58.9733	0.736441	0.968404	9.81	0.803094	60.98	Cody Mason
zAmazon945-1-45	zircon	10.6314	0.850512	171.2	51.9186	36.4797	1.13056	60.3219	0.702632	2.78475	8.31	0.802334	60.65	Cody Mason
zAmazon946-5-140	zircon	10.4181	0.833446	177.3	32.1166	17.5622	0	36.1594	0.546825	1.78454	37.18	0.876051	98.57	Cody Mason
zAmazon946-8-51	zircon	15.3773	1.23019	185.8	54.8524	53.815	0.968581	67.2455	0.981086	4.4825	9.7	0.7996	60.32	Cody Mason
zAmazon945-1-13	zircon	14.0645	1.12516	239.6	76.5631	106.383	9.9395	101.102	1.38948	6.21631	9.46	0.804789	62.82	Cody Mason
zAmazon946-8-68	zircon	31.0404	2.48323	242.3	200.798	35.2242	1.93885	208.916	0.175421	29.23	14.54	0.834164	70.86	Cody Mason
zAmazon946-4-53	zircon	15.2517	1.22014	242.9	544.515	84.0889	4.81791	563.896	0.154429	31.5665	1.95	0.680318	34.74	Cody Mason
zAmazon946-8-35	zircon	23.2762	1.86209	244.4	132.719	31.1339	0.807845	139.89	0.234584	14.4306	11.63	0.82039	65.64	Cody Mason
zAmazon946-9-49	zircon	218.081	17.4465	245.8	30.37	26.6118	1.69771	36.5045	0.876254	36.5971	16.55	0.836061	74.52	Cody Mason
zAmazon946-4-68	zircon	37.3322	2.98657	248.2	502.069	227.249	80.6325	554.785	0.452626	73.4249	1.75	0.654783	32.52	Cody Mason
zAmazon946-4-119	zircon	190.552	15.2442	253.2	42.0852	26.466	2.4594	48.1899	0.628867	37.103	3.82	0.73819	44.74	Cody Mason
zAmazon945-1-69	zircon	11.3021	0.904165	254.2	115.847	11.8591	2.64671	118.59	0.102369	5.70905	7.1	0.789864	54.87	Cody Mason
zAmazon946-5-132	zircon	264.331	21.1465	264.8	91.2289	39.0814	2.15065	100.236	0.428389	120.919	13.45	0.828302	69.52	Cody Mason
zAmazon946-5-83	zircon	585.484	46.8387	265.4	75.0076	62.2715	2.1285	89.3532	0.830202	245.678	13.59	0.829381	71.34	Cody Mason
zAmazon945-1-115	zircon	117.95	9.43596	266.7	370.229	126.836	13.7067	399.495	0.342588	200.247	6.86	0.780876	53.34	Cody Mason
zAmazon946-4-58	zircon	20.1614	1.61291	301.8	271.375	92.7381	0	292.723	0.341734	21.2628	1.61	0.666831	33.63	Cody Mason
zAmazon945-1-77	zircon	69.9262	5.5941	308.9	215.499	54.6578	3.91455	228.1	0.253634	60.7956	2.4	0.703526	38.15	Cody Mason
zAmazon945-1-35	zircon	21.512	1.72096	310.4	128.701	37.8728	0.514508	137.421	0.294271	13.5485	18.26	0.848135	78.53	Cody Mason
zAmazon945-1-41	zircon	86.9531	6.95625	316	54.083	64.8414	3.57255	69.0273	1.19893	24.9746	5.26	0.763369	50.89	Cody Mason
zAmazon945-1-24	zircon	13.7799	1.1024	325.6	249.394	70.2504	1.45884	265.573	0.281684	15.4474	6.44	0.781725	53.37	Cody Mason
zAmazon946-9-89	zircon	25.452	2.03616	325.7	55.9161	53.7525	3.394	68.3069	0.961305	8.01913	24.84	0.850158	81.9	Cody Mason
zAmazon946-5-26	zircon	22.3217	1.78573	362.9	228.134	255.575	3.86048	286.987	1.12028	30.028	29.98	0.863603	91.02	Cody Mason
zAmazon945-1-76	zircon	173.312	13.865	455.7	158.975	43.2437	2.70747	168.943	0.272016	116.136	3.47	0.726798	41.8	Cody Mason
zAmazon946-4-121	zircon	48.2081	3.85665	464	231.749	116.426	9.52142	258.598	0.50238	48.9296	2.99	0.724303	41.96	Cody Mason
zAmazon946-8-104	zircon	304.006	24.3205	474.2	56.3139	49.9977	0.948056	67.8281	0.88784	91.6171	9.91	0.803594	61.57	Cody Mason
zAmazon945-1-139	zircon	47.8619	3.82896	505.5	194.557	109.235	2.18615	219.714	0.561453	42.9032	4.34	0.752651	47.38	Cody Mason
zAmazon946-9-98	zircon	445.545	35.6436	516	18.3734	26.747	8.82579	24.5747	1.45574	51.3458	19.11	0.836923	76.18	Cody Mason
zAmazon946-4-135	zircon	289.5	23.16	519.5	115.376	44.7018	6.94402	125.701	0.387445	131.146	1.38	0.655947	32.52	Cody Mason
zAmazon945-1-23	zircon	181.124	14.4899	525.3	172.599	61.2409	2.40279	186.709	0.354816	137.785	3.91	0.745667	45.45	Cody Mason
zAmazon945-1-32	zircon	407.698	32.6159	530.9	229.176	150.768	2.63163	263.896	0.657869	436.578	3.57	0.730492	43.35	Cody Mason
zAmazon946-5-59	zircon	194.372	15.5498	532.6	109.042	44.6998	0	119.332	0.409931	103.729	10.5	0.816476	64.89	Cody Mason
zAmazon945-1-60	zircon	217.186	17.3749	541.2	327.879	79.3304	8.36576	346.182	0.241951	334.398	8.99	0.811104	62.27	Cody Mason
zAmazon946-4-3	zircon	25.5645	2.04516	543.5	66.3751	23.9219	6.60879	71.9149	0.360406	6.4928	1.45	0.653198	32.19	Cody Mason
zAmazon945-1-2	zircon	284.388	22.7511	545.4	220.022	93.331	6.21042	241.538	0.424189	311.571	12.11	0.822043	67.02	Cody Mason
zAmazon946-4-38	zircon	493.127	39.4502	546.7	40.6126	104.561	9.68046	64.731	2.57461	120.395	1.98	0.675512	36.62	Cody Mason
zAmazon946-5-70	zircon	585.841	46.8673	546.9	101.607	32.5429	0	109.099	0.32028	296.147	10.73	0.818148	65.09	Cody Mason
zAmazon946-8-8	zircon	250.97	20.0776	563.5	43.2825	19.8213	1.2628	47.8517	0.457951	52.3823	7.44	0.79309	57.14	Cody Mason
zAmazon945-1-110	zircon	439.125	35.13	585.3	265.115	91.9328	9.58756	286.326	0.346766	485.231	1.96	0.694503	37.07	Cody Mason	zircon? Lost?
zAmazon946-9-128	zircon	475.026	38.0021	600.3	64.1793	26.2634	1.95254	70.2349	0.409219	155.882	14.39	0.832773	71.53	Cody Mason
zAmazon946-5-89	zircon	199.133	15.9306	601.2	50.1805	30.7022	0	57.2482	0.611835	55.0133	38.65	0.879065	101.28	Cody Mason
zAmazon946-8-81	zircon	556.973	44.5578	610.1	162.937	38.2363	1.83057	171.748	0.234669	454.426	15.4	0.839769	74.13	Cody Mason
zAmazon945-1-28	zircon	523.379	41.8703	615.7	57.3528	36.9293	3.28525	65.8704	0.643898	148.083	5.72	0.765208	50.46	Cody Mason
zAmazon945-1-130	zircon	299.008	23.9206	619.9	150.768	73.9158	0.993121	167.788	0.490263	224.558	9.46	0.81042	63	Cody Mason
zAmazon946-9-55	zircon	469.169	37.5335	621.7	121.707	47.1171	0	132.553	0.387135	256.91	4.49	0.740186	44.42	Cody Mason
zAmazon946-8-21	zircon	71.6203	5.72962	642	259.057	91.8093	10.0246	280.241	0.354398	87.7148	9.38	0.805505	60.62	Cody Mason
zAmazon946-9-134	zircon	483.124	38.6499	647.6	27.176	8.28626	0	29.0835	0.304911	65.6774	13.58	0.83256	70.94	Cody Mason
zAmazon945-1-140	zircon	136.087	10.8869	705	164.422	51.6474	2.32548	176.323	0.314115	96.1731	4.04	0.736068	43.47	Cody Mason
zAmazon946-9-40	zircon	107.363	8.58903	756.8	32.3722	22.6463	3.30944	37.6019	0.699561	17.6733	8.49	0.803356	61.09	Cody Mason
zAmazon946-8-13	zircon	197.741	15.8193	788.6	7.75037	3.79166	0.484485	8.62564	0.489223	7.9354	19.3922	0.848286	79.6395	Cody Mason
zAmazon946-4-46	zircon	382.065	30.5652	790	63.1722	82.9317	9.12128	82.3087	1.31279	107.116	1.03	0.615863	29.63	Cody Mason
zAmazon946-5-47	zircon	460.071	36.8057	845	3.64049	3.42555	0	4.42905	0.940957	8.80525	5.69	0.773365	52.77	Cody Mason
zAmazon945-1-138	zircon	32.2822	2.58258	860	46.4797	31.1289	6.12105	53.6762	0.669731	6.7047	3.07	0.713967	40.58	Cody Mason
zAmazon946-4-88	zircon	119.839	9.58711	899	82.8491	57.0477	0	95.9815	0.688574	44.3172	2.93	0.707359	39.6	Cody Mason
zAmazon945-1-132	zircon	422.479	33.7983	953	69.6957	47.0334	3.43829	80.54	0.674839	152.131	8.28	0.801539	60.36	Cody Mason
zAmazon945-1-113	zircon	4.68073	0.374458	956	93.6015	66.218	2.26384	108.856	0.707447	2.06964	4.15	0.750813	47.32	Cody Mason
zAmazon945-1-75	zircon	548.567	43.8854	965	22.497	20.5402	1.72384	27.234	0.913021	64.9357	5.45	0.772546	52.66	Cody Mason
zAmazon946-5-127	zircon	19.1302	1.53041	1010	51.7311	29.4932	0	58.5204	0.570126	5.20736	26.24	0.859553	86.95	Cody Mason
zAmazon946-5-86	zircon	52.7979	4.22383	1014	107.913	44.908	0	118.25	0.416152	27.4008	10	0.809829	62.4	Cody Mason
zAmazon945-1-26	zircon	410.388	32.8311	1015	79.4085	32.9062	1.06518	86.9889	0.414392	158.849	8.82	0.798847	58.85	Cody Mason
zAmazon946-5-56	zircon	10.0039	0.80031	1016	179.957	58.8965	0	193.515	0.327281	8.73482	15.16	0.835562	72.46	Cody Mason
zAmazon945-1-4	zircon	280.798	22.4639	1016	106.459	35.5029	1.47053	114.64	0.333488	151.145	19.17	0.850749	80.15	Cody Mason
zAmazon946-9-66	zircon	9.30743	0.744594	1022	25.5172	11.4555	0.817252	28.1584	0.448931	1.23036	34.38	0.868662	92.22	Cody Mason
zAmazon945-1-106	zircon	60.4939	4.83952	1024	269.572	95.8102	1.78611	291.636	0.355417	74.1443	5.26	0.775445	52.04	Cody Mason
zAmazon945-1-137	zircon	891.325	71.306	1024	67.7072	27.279	4.63665	74.01	0.402897	294.555	6.14	0.76882	50.55	Cody Mason
zAmazon946-8-28	zircon	10.2257	0.81806	1026	117.822	29.9849	1.32409	124.731	0.254494	5.87101	21.22	0.852754	81.23	Cody Mason
zAmazon946-5-90	zircon	72.0491	5.76393	1031	75.366	13.3125	0	78.4306	0.176638	26.7446	32.62	0.872898	93.8	Cody Mason
zAmazon946-8-9	zircon	12.6564	1.01251	1039	45.4875	10.1463	3.02771	47.8383	0.223057	2.65521	9.28	0.812352	62.6	Cody Mason
zAmazon945-1-134	zircon	6.40156	0.512125	1041	362.814	103.069	1.49181	386.547	0.284082	10.4957	6.36	0.785912	54.49	Cody Mason
zAmazon946-5-126	zircon	6.87116	0.549693	1056	91.9074	35.3464	0	100.044	0.384587	3.14555	19.01	0.847278	78.56	Cody Mason
zAmazon946-9-56	zircon	237.29	18.9832	1057	100.191	45.1301	3.08759	110.596	0.450439	115.431	9.1	0.800478	59.5	Cody Mason
zAmazon945-1-102	zircon	361.861	28.9488	1067	42.6792	13.8533	3.02603	45.8834	0.324591	72.0957	6.21	0.783119	53.95	Cody Mason
zAmazon945-1-46	zircon	491.483	39.3187	1079	93.543	33.8998	3.54959	101.365	0.362398	228.712	10.59	0.81768	65.08	Cody Mason
zAmazon946-8-42	zircon	416.763	33.341	1099	65.7622	57.269	4.18735	78.9665	0.87085	144.025	6.71	0.785294	55.89	Cody Mason
zAmazon946-8-49	zircon	24.3064	1.94451	1118	112.315	54.7949	0	124.929	0.487866	13.1563	7.92	0.800786	59.6	Cody Mason
zAmazon946-5-121	zircon	195.831	15.6665	1143	41.4146	11.4846	0	44.0584	0.277308	40.8493	25.9	0.863961	88.3	Cody Mason
zAmazon946-4-57	zircon	219.788	17.5831	1161	177.559	82.6806	24.475	196.714	0.465652	161.518	1.92	0.682198	35.7	Cody Mason
zAmazon946-8-5	zircon	289.291	23.1433	1182	100.442	25.5033	0	106.313	0.25391	139.468	10.87	0.82195	66.27	Cody Mason
zAmazon946-5-122	zircon	576.835	46.1468	1197	57.361	26.0804	-1.8719	63.3553	0.454671	172.014	15.45	0.831374	71.02	Cody Mason
zAmazon946-4-a-126	zircon	464.208	37.1367	1215	34.2836	19.4561	2.72667	38.776	0.567505	79.305	6.96	0.787673	55.85	Cody Mason
zAmazon946-9-135	zircon	258.266	20.6613	1287	60.0134	14.8806	0	63.4389	0.247955	72.6954	10.05	0.806629	60.59	Cody Mason
zAmazon946-5-55	zircon	594.095	47.5276	1370	140.451	87.3369	3.23771	160.573	0.62183	454.841	17.87	0.840482	75.88	Cody Mason
zAmazon945-1-15	zircon	184.903	14.7922	1401	101.426	51.3179	14.9081	113.314	0.505965	91.5089	7.57	0.797609	58.74	Cody Mason
zAmazon946-8-37	zircon	735.009	58.8008	1457	16.0538	16.1548	1.00025	19.7776	1.00629	71.852	28.09	0.859476	87.94	Cody Mason
zAmazon945-1-121	zircon	455.63	36.4504	1474	123.236	33.4827	2.92704	130.959	0.271696	261.74	6.42	0.785086	54.31	Cody Mason
zAmazon946-8-105	zircon	210.542	16.8433	1507	76.4098	41.0315	2.43055	85.8674	0.536993	80.8464	11.56	0.815012	64.63	Cody Mason
zAmazon946-5-24	zircon	576.148	46.0919	1523	68.5932	32.227	0	76.0119	0.469828	212.63	23.62	0.856205	84.25	Cody Mason
zAmazon946-9-21	zircon	792.884	63.4307	1543	63.8345	38.8276	3.91325	72.7922	0.608255	262.77	7.18	0.790679	56.85	Cody Mason
zAmazon946-9-34	zircon	431.43	34.5144	1650	128.019	31.5413	0	135.28	0.246379	253.168	5.56	0.778256	52.31	Cody Mason
zAmazon945-1-133	zircon	340.251	27.22	1677	80.6713	49.9338	2.15145	92.1769	0.618979	131.376	4.41	0.75706	48.44	Cody Mason
zAmazon946-8-29	zircon	667.063	53.365	1712	77.7223	33.0787	5.38667	85.3639	0.425601	277.702	20.87	0.852223	81.5	Cody Mason
zAmazon945-1-78	zircon	65.8552	5.26842	1787	167.403	90.1191	3.31976	188.165	0.538338	48.3723	2.83	0.719502	41.22	Cody Mason
zAmazon946-5-12	zircon	200.828	16.0663	1791	86.8525	82.4809	3.10035	105.855	0.949666	94.0903	9.33	0.806258	62.56	Cody Mason
zAmazon945-1-104	zircon	1038.75	83.0996	1811	88.6069	85.4802	4.91881	108.309	0.964712	444.451	1.91	0.680796	36.32	Cody Mason
zAmazon945-1-42	zircon	6.48952	0.519162	1860	36.9768	15.9419	0	40.6466	0.431131	1.00687	2.34	0.706661	39.04	Cody Mason
zAmazon946-5-138	zircon	538.3	43.064	1982	282.587	157.339	6.87086	318.84	0.556781	720.468	4.21	0.747701	46.41	Cody Mason
zAmazon946-8-82	zircon	398.166	31.8533	1998	176.899	83.4882	14.2927	196.19	0.471954	354.396	13.17	0.814587	64.34	Cody Mason
zAmazon945-1-128	zircon	293.196	23.4557	2033	109.02	58.5704	3.95613	122.523	0.537243	150.99	4.75	0.762263	49.4	Cody Mason
zAmazon946-5-72	zircon	321.257	25.7005	2053	187.489	71.0154	0	203.837	0.378771	300.002	12.67	0.82778	69.27	Cody Mason
zAmazon946-8-133	zircon	487.768	39.0214	2092	139.852	303.57	11.7485	209.792	2.17066	482.379	21.54	0.839362	78	Cody Mason
zAmazon945-1-74	zircon	1219.03	97.5227	2227	44.1672	29.1349	1.22489	50.8802	0.659649	297.749	7.67	0.795653	58.54	Cody Mason
zAmazon946-8-33	zircon	63.9553	5.11643	2407	25.63	22.212	1.33835	30.7499	0.86664	8.39534	7.02	0.785322	55.86	Cody Mason
zAmazon945-1-3	zircon	1515.21	121.217	2710	28.428	24.0368	3.69914	33.9798	0.845534	241.215	5.08	0.756088	48.65	Cody Mason

## Sheet: crossplot
sample ID	He age (Ma)	error (2s)	U-Pb age (Ma)	error (2s)	1:1 line
zAmazon945-1-2	284.388	22.7511	545.4	5.8	1	1
zAmazon945-1-3	1515.21	121.217	2710	19	10	10
zAmazon945-1-4	280.798	22.4639	1016	27	100	100
zAmazon945-1-13	14.0645	1.12516	239.6	4.4	500	500
zAmazon945-1-15	184.903	14.7922	1401	28	1000	1000
zAmazon945-1-23	181.124	14.4899	525.3	4	1600	1600
zAmazon945-1-24	13.7799	1.1024	325.6	4
zAmazon945-1-26	410.388	32.8311	1015	37
zAmazon945-1-28	523.379	41.8703	615.7	6.2
zAmazon945-1-32	407.698	32.6159	530.9	5.7
zAmazon945-1-35	21.512	1.72096	310.4	3.1
zAmazon945-1-41	86.9531	6.95625	316	11
zAmazon945-1-42	6.48952	0.519162	1860	24
zAmazon945-1-45	10.6314	0.850512	171.2	2.8
zAmazon945-1-46	491.483	39.3187	1079	31
zAmazon945-1-49	32.1807	2.57446	30.11	0.6
zAmazon945-1-60	217.186	17.3749	541.2	8.1
zAmazon945-1-69	11.3021	0.904165	254.2	12
zAmazon945-1-71	9.4017	0.752136	12.3	0.7	was DISC (but used 16% cutoff)
zAmazon945-1-74	1219.03	97.5227	2227	22
zAmazon945-1-75	548.567	43.8854	965	56
zAmazon945-1-76	173.312	13.865	455.7	5.4					age bins	n zircons per sample (across 6 samples, ~21 per sample)	for only 60 grains
zAmazon945-1-77	69.9262	5.5941	308.9	3.5					0-75 Ma	no more
zAmazon945-1-78	65.8552	5.26842	1787	22					75-225 Ma	1.70558
zAmazon945-1-97	247.18	19.7744	157.5	1.9	bunk				225-425 Ma	2.38987
zAmazon945-1-99	14.6981	1.17584	149.4	2.2					425-750 Ma	3.90675
zAmazon945-1-100	30.9766	2.47813	40.4	1.5					750-900 Ma	1.08884
zAmazon945-1-102	361.861	28.9488	1067	51					900-1300 Ma	4.95448
zAmazon945-1-104	1038.75	83.0996	1811	28					1300-1500 Ma	1.26138														13.6364
zAmazon945-1-106	60.4939	4.83952	1024	32					1500-1800	1.58811
zAmazon945-1-107	2.81979	0.225583	134.5	2.1					1800-2000 Ma	1.26138
zAmazon945-1-110	439.125	35.13	585.3	5.2					2000-2250 Ma	1.10426
zAmazon945-1-113	4.68073	0.374458	956	47					>2250 Ma	1.12922
zAmazon945-1-115	117.95	9.43596	266.7	2.7						20.3899
zAmazon945-1-118	15.2591	1.22072	18.49	0.69
zAmazon945-1-121	455.63	36.4504	1474	27
zAmazon945-1-128	293.196	23.4557	2033	20
zAmazon945-1-130	299.008	23.9206	619.9	4.9
zAmazon945-1-132	422.479	33.7983	953	30
zAmazon945-1-133	340.251	27.22	1677	24
zAmazon945-1-134	6.40156	0.512125	1041	25
zAmazon945-1-136	59.5002	4.76002	62.6	1.3	was Disc (used 16% cutoff)
zAmazon945-1-137	891.325	71.306	1024	20
zAmazon945-1-138	32.2822	2.58258	860	4.9
zAmazon945-1-139	47.8619	3.82896	505.5	30
zAmazon945-1-140	136.087	10.8869	705	24
zAmazon946-4-3	25.5645	2.04516	543.5	5.9
zAmazon946-4-15	100.135	8.01082	94.2	1.7
zAmazon946-4-38	493.127	39.4502	546.7	8.3
zAmazon946-4-46	382.065	30.5652	790	13
zAmazon946-4-53	15.2517	1.22014	242.9	3.6
zAmazon946-4-57	219.788	17.5831	1161	25
zAmazon946-4-58	20.1614	1.61291	301.8	4
zAmazon946-4-68	37.3322	2.98657	248.2	2.5
zAmazon946-4-77	41.8424	3.34739	91.5	2
zAmazon946-4-88	119.839	9.58711	899	55
zAmazon946-4-119	190.552	15.2442	253.2	4.7
zAmazon946-4-121	48.2081	3.85665	464	7.3
zAmazon946-4-135	289.5	23.16	519.5	6.1
zAmazon946-4-a-126	464.208	37.1367	1215	49
zAmazon946-8-5	289.291	23.1433	1182	26
zAmazon946-8-8	250.97	20.0776	563.5	8.2
zAmazon946-8-9	12.6564	1.01251	1039	69
zAmazon946-8-13	197.741	15.8193	788.6	7.2	zircon? Lost?
zAmazon946-8-21	71.6203	5.72962	642	5.9
zAmazon946-8-28	10.2257	0.81806	1026	30
zAmazon946-8-29	667.063	53.365	1712	21
zAmazon946-8-33	63.9553	5.11643	2407	27
zAmazon946-8-35	23.2762	1.86209	244.4	3.1
zAmazon946-8-36	114.71	9.17679	120.7	1.6
zAmazon946-8-37	735.009	58.8008	1457	49
zAmazon946-8-42	416.763	33.341	1099	31
zAmazon946-8-49	24.3064	1.94451	1118	23
zAmazon946-8-51	15.3773	1.23019	185.8	3.8
zAmazon946-8-68	31.0404	2.48323	242.3	3.3
zAmazon946-8-81	556.973	44.5578	610.1	5
zAmazon946-8-82	398.166	31.8533	1998	44
zAmazon946-8-104	304.006	24.3205	474.2	8
zAmazon946-8-105	210.542	16.8433	1507	42
zAmazon946-8-133	487.768	39.0214	2092	21
zAmazon946-9-21	792.884	63.4307	1543	22
zAmazon946-9-34	431.43	34.5144	1650	14
zAmazon946-9-40	107.363	8.58903	756.8	8.4
zAmazon946-9-49	218.081	17.4465	245.8	4.6
zAmazon946-9-55	469.169	37.5335	621.7	5.6
zAmazon946-9-56	237.29	18.9832	1057	20
zAmazon946-9-66	9.30743	0.744594	1022	35
zAmazon946-9-87	3.77876	0.302301	163.2	2.3
zAmazon946-9-89	25.452	2.03616	325.7	3.5
zAmazon946-9-98	445.545	35.6436	516	7.2
zAmazon946-9-108	2.9413	0.235304	127.8	1.8
zAmazon946-9-128	475.026	38.0021	600.3	6.4
zAmazon946-9-134	483.124	38.6499	647.6	7.7
zAmazon946-9-135	258.266	20.6613	1287	31
zAmazon946-5-12	200.828	16.0663	1791	18
zAmazon946-5-24	576.148	46.0919	1523	15
zAmazon946-5-26	22.3217	1.78573	362.9	6.7	zircon?
zAmazon946-5-47	460.071	36.8057	845	14
zAmazon946-5-55	594.095	47.5276	1370	15
zAmazon946-5-56	10.0039	0.80031	1016	16
zAmazon946-5-59	194.372	15.5498	532.6	5.9
zAmazon946-5-70	585.841	46.8673	546.9	4
zAmazon946-5-72	321.257	25.7005	2053	11
zAmazon946-5-83	585.484	46.8387	265.4	3.8	bunk
zAmazon946-5-86	52.7979	4.22383	1014	31
zAmazon946-5-89	199.133	15.9306	601.2	4.9
zAmazon946-5-90	72.0491	5.76393	1031	20
zAmazon946-5-121	195.831	15.6665	1143	21
zAmazon946-5-122	576.835	46.1468	1197	23
zAmazon946-5-126	6.87116	0.549693	1056	21
zAmazon946-5-127	19.1302	1.53041	1010	33
zAmazon946-5-132	264.331	21.1465	264.8	3
zAmazon946-5-138	538.3	43.064	1982	11
zAmazon946-5-140	10.4181	0.833446	177.3	2.8

## Sheet: pie
sample ID	He age (Ma)	U-Pb age (Ma)			sample ID	He age (Ma)	U-Pb age (Ma)									He cooling ages by period
zAmazon945-1-107	2.81979	134.5			zAmazon945-1-71	9.4017	12.3									Neogene 0-23	paleogene 23-66	Cret 66-145	Jur 145-201	Tri 201-252	Perm 252-299	Carb 299-359	Dev 359-419	Sil 419-444	Ord 444-485	Camb 485-541	Pan Afr-Brasil 542-900	Sunsas (900-1300)	RNJ (1500-	total counts
zAmazon946-9-108	2.9413	127.8			zAmazon945-1-118	15.2591	18.49									2.81979	23.2762	69.9262	173.312	210.542	258.266	304.006	361.861	422.479	445.545	487.768	548.567	1038.75	1515.21
zAmazon946-9-87	3.77876	163.2			zAmazon945-1-49	32.1807	30.11									2.9413	24.3064	71.6203	181.124	217.186	264.331	321.257	382.065	431.43	455.63	491.483	556.973	1219.03
zAmazon945-1-113	4.68073	956			zAmazon945-1-100	30.9766	40.4									3.77876	25.452	72.0491	184.903	218.081	280.798	340.251	398.166	439.125	460.071	493.127	576.148
zAmazon945-1-134	6.40156	1041			zAmazon945-1-136	59.5002	62.6									4.68073	25.5645	86.9531	190.552	219.788	284.388		407.698		464.208	523.379	576.835
zAmazon945-1-42	6.48952	1860			zAmazon946-4-77	41.8424	91.5									6.40156	30.9766	100.135	194.372	237.29	289.291		410.388		469.169	538.3	585.484
zAmazon946-5-126	6.87116	1056			zAmazon946-4-15	100.135	94.2									6.48952	31.0404	107.363	195.831	247.18	289.5		416.763		475.026		585.841
zAmazon946-9-66	9.30743	1022			zAmazon946-8-36	114.71	120.7									6.87116	32.1807	114.71	197.741	250.97	293.196				483.124		594.095
zAmazon945-1-71	9.4017	12.3			zAmazon946-9-108	2.9413	127.8									9.30743	32.2822	117.95	199.133		299.008						667.063
zAmazon946-5-56	10.0039	1016			zAmazon945-1-107	2.81979	134.5									9.4017	37.3322	119.839	200.828								735.009
zAmazon946-8-28	10.2257	1026			zAmazon945-1-99	14.6981	149.4									10.0039	41.8424	136.087									792.884
zAmazon946-5-140	10.4181	177.3			zAmazon945-1-97	247.18	157.5	bunk								10.2257	47.8619										891.325
zAmazon945-1-45	10.6314	171.2			zAmazon946-9-87	3.77876	163.2									10.4181	48.2081
zAmazon945-1-69	11.3021	254.2			zAmazon945-1-45	10.6314	171.2									10.6314	52.7979
zAmazon946-8-9	12.6564	1039			zAmazon946-5-140	10.4181	177.3									11.3021	59.5002
zAmazon945-1-24	13.7799	325.6			zAmazon946-8-51	15.3773	185.8									12.6564	60.4939
zAmazon945-1-13	14.0645	239.6			zAmazon945-1-13	14.0645	239.6									13.7799	63.9553
zAmazon945-1-99	14.6981	149.4			zAmazon946-8-68	31.0404	242.3									14.0645	65.8552
zAmazon946-4-53	15.2517	242.9			zAmazon946-4-53	15.2517	242.9									14.6981
zAmazon945-1-118	15.2591	18.49			zAmazon946-8-35	23.2762	244.4									15.2517
zAmazon946-8-51	15.3773	185.8			zAmazon946-9-49	218.081	245.8									15.2591
zAmazon946-5-127	19.1302	1010			zAmazon946-4-68	37.3322	248.2									15.3773
zAmazon946-4-58	20.1614	301.8			zAmazon946-4-119	190.552	253.2									19.1302
zAmazon945-1-35	21.512	310.4			zAmazon945-1-69	11.3021	254.2									20.1614
zAmazon946-5-26	22.3217	362.9			zAmazon946-5-132	264.331	264.8									21.512
zAmazon946-8-35	23.2762	244.4			zAmazon946-5-83	585.484	265.4	bunk								22.3217
zAmazon946-8-49	24.3064	1118			zAmazon945-1-115	117.95	266.7								%	22.3214	15.1786	8.92857	8.03571	5.35714	7.14286	2.67857	5.35714	2.67857	6.25	4.46429	8.92857	1.78571	0.892857
zAmazon946-9-89	25.452	325.7			zAmazon946-4-58	20.1614	301.8								#	25	17	10	9	6	8	3	6	3	7	5	10	2	1	112
zAmazon946-4-3	25.5645	543.5			zAmazon945-1-77	69.9262	308.9
zAmazon945-1-100	30.9766	40.4			zAmazon945-1-35	21.512	310.4
zAmazon946-8-68	31.0404	242.3			zAmazon945-1-41	86.9531	316
zAmazon945-1-49	32.1807	30.11			zAmazon945-1-24	13.7799	325.6
zAmazon945-1-138	32.2822	860			zAmazon946-9-89	25.452	325.7
zAmazon946-4-68	37.3322	248.2			zAmazon946-5-26	22.3217	362.9
zAmazon946-4-77	41.8424	91.5			zAmazon945-1-76	173.312	455.7
zAmazon945-1-139	47.8619	505.5			zAmazon946-4-121	48.2081	464
zAmazon946-4-121	48.2081	464			zAmazon946-8-104	304.006	474.2
zAmazon946-5-86	52.7979	1014			zAmazon945-1-139	47.8619	505.5
zAmazon945-1-136	59.5002	62.6			zAmazon946-9-98	445.545	516
zAmazon945-1-106	60.4939	1024			zAmazon946-4-135	289.5	519.5
zAmazon946-8-33	63.9553	2407			zAmazon945-1-23	181.124	525.3
zAmazon945-1-78	65.8552	1787			zAmazon945-1-32	407.698	530.9
zAmazon945-1-77	69.9262	308.9			zAmazon946-5-59	194.372	532.6
zAmazon946-8-21	71.6203	642			zAmazon945-1-60	217.186	541.2
zAmazon946-5-90	72.0491	1031			zAmazon946-4-3	25.5645	543.5
zAmazon945-1-41	86.9531	316			zAmazon945-1-2	284.388	545.4
zAmazon946-4-15	100.135	94.2			zAmazon946-4-38	493.127	546.7
zAmazon946-9-40	107.363	756.8			zAmazon946-5-70	585.841	546.9
zAmazon946-8-36	114.71	120.7			zAmazon946-8-8	250.97	563.5
zAmazon945-1-115	117.95	266.7			zAmazon945-1-110	439.125	585.3
zAmazon946-4-88	119.839	899			zAmazon946-9-128	475.026	600.3
zAmazon945-1-140	136.087	705			zAmazon946-5-89	199.133	601.2
zAmazon945-1-76	173.312	455.7			zAmazon946-8-81	556.973	610.1
zAmazon945-1-23	181.124	525.3			zAmazon945-1-28	523.379	615.7
zAmazon945-1-15	184.903	1401			zAmazon945-1-130	299.008	619.9
zAmazon946-4-119	190.552	253.2			zAmazon946-9-55	469.169	621.7
zAmazon946-5-59	194.372	532.6			zAmazon946-8-21	71.6203	642
zAmazon946-5-121	195.831	1143			zAmazon946-9-134	483.124	647.6
zAmazon946-8-13	197.741	788.6			zAmazon945-1-140	136.087	705
zAmazon946-5-89	199.133	601.2			zAmazon946-9-40	107.363	756.8
zAmazon946-5-12	200.828	1791			zAmazon946-8-13	197.741	788.6
zAmazon946-8-105	210.542	1507			zAmazon946-4-46	382.065	790
zAmazon945-1-60	217.186	541.2			zAmazon946-5-47	460.071	845
zAmazon946-9-49	218.081	245.8			zAmazon945-1-138	32.2822	860
zAmazon946-4-57	219.788	1161			zAmazon946-4-88	119.839	899
zAmazon946-9-56	237.29	1057			zAmazon945-1-132	422.479	953
zAmazon945-1-97	247.18	157.5	bunk		zAmazon945-1-113	4.68073	956
zAmazon946-8-8	250.97	563.5			zAmazon945-1-75	548.567	965
zAmazon946-9-135	258.266	1287			zAmazon946-5-127	19.1302	1010
zAmazon946-5-132	264.331	264.8			zAmazon946-5-86	52.7979	1014
zAmazon945-1-4	280.798	1016			zAmazon945-1-26	410.388	1015
zAmazon945-1-2	284.388	545.4			zAmazon946-5-56	10.0039	1016
zAmazon946-8-5	289.291	1182			zAmazon945-1-4	280.798	1016
zAmazon946-4-135	289.5	519.5			zAmazon946-9-66	9.30743	1022
zAmazon945-1-128	293.196	2033			zAmazon945-1-106	60.4939	1024
zAmazon945-1-130	299.008	619.9			zAmazon945-1-137	891.325	1024
zAmazon946-8-104	304.006	474.2			zAmazon946-8-28	10.2257	1026
zAmazon946-5-72	321.257	2053			zAmazon946-5-90	72.0491	1031
zAmazon945-1-133	340.251	1677			zAmazon946-8-9	12.6564	1039
zAmazon945-1-102	361.861	1067			zAmazon945-1-134	6.40156	1041		40.7407
zAmazon946-4-46	382.065	790			zAmazon946-5-126	6.87116	1056
zAmazon946-8-82	398.166	1998			zAmazon946-9-56	237.29	1057
zAmazon945-1-32	407.698	530.9			zAmazon945-1-102	361.861	1067
zAmazon945-1-26	410.388	1015			zAmazon945-1-46	491.483	1079
zAmazon946-8-42	416.763	1099			zAmazon946-8-42	416.763	1099
zAmazon945-1-132	422.479	953			zAmazon946-8-49	24.3064	1118
zAmazon946-9-34	431.43	1650			zAmazon946-5-121	195.831	1143
zAmazon945-1-110	439.125	585.3			zAmazon946-4-57	219.788	1161
zAmazon946-9-98	445.545	516			zAmazon946-8-5	289.291	1182
zAmazon945-1-121	455.63	1474			zAmazon946-5-122	576.835	1197
zAmazon946-5-47	460.071	845			zAmazon946-4-a-126	464.208	1215
zAmazon946-4-a-126	464.208	1215			zAmazon946-9-135	258.266	1287
zAmazon946-9-55	469.169	621.7			zAmazon946-5-55	594.095	1370
zAmazon946-9-128	475.026	600.3			zAmazon945-1-15	184.903	1401
zAmazon946-9-134	483.124	647.6			zAmazon946-8-37	735.009	1457
zAmazon946-8-133	487.768	2092			zAmazon945-1-121	455.63	1474
zAmazon945-1-46	491.483	1079			zAmazon946-8-105	210.542	1507
zAmazon946-4-38	493.127	546.7			zAmazon946-5-24	576.148	1523
zAmazon945-1-28	523.379	615.7			zAmazon946-9-21	792.884	1543
zAmazon946-5-138	538.3	1982			zAmazon946-9-34	431.43	1650
zAmazon945-1-75	548.567	965			zAmazon945-1-133	340.251	1677
zAmazon946-8-81	556.973	610.1			zAmazon946-8-29	667.063	1712
zAmazon946-5-24	576.148	1523			zAmazon945-1-78	65.8552	1787
zAmazon946-5-122	576.835	1197			zAmazon946-5-12	200.828	1791
zAmazon946-5-83	585.484	265.4	bunk		zAmazon945-1-104	1038.75	1811
zAmazon946-5-70	585.841	546.9			zAmazon945-1-42	6.48952	1860
zAmazon946-5-55	594.095	1370			zAmazon946-5-138	538.3	1982
zAmazon946-8-29	667.063	1712			zAmazon946-8-82	398.166	1998
zAmazon946-8-37	735.009	1457			zAmazon945-1-128	293.196	2033
zAmazon946-9-21	792.884	1543			zAmazon946-5-72	321.257	2053
zAmazon945-1-137	891.325	1024			zAmazon946-8-133	487.768	2092
zAmazon945-1-104	1038.75	1811			zAmazon945-1-74	1219.03	2227
zAmazon945-1-74	1219.03	2227			zAmazon946-8-33	63.9553	2407
zAmazon945-1-3	1515.21	2710			zAmazon945-1-3	1515.21	2710
